# Supplementary material for: Prevalence and incidence of myalgic encephalomyelitis/chronic fatigue syndrome in Europe—the Euro-epiME study from the European network EUROMENE: a protocol for a systematic review
Source: PubMed Central journal article supplement — BMJ Open. 2018 Sep 4;8(9):e020817. doi: 10.1136/bmjopen-2017-020817 (PMC6129044; doi:10.1136/bmjopen-2017-020817), 2018-09-04
Supplement: bmjopen-2017-020817.draft_revisions.pdf [file bmjopen-2017-020817.draft_revisions.pdf]

# BMJ Open

BMJ Open is committed to open peer review. As part of this commitment we make the peer review history of every article we publish publicly available.

When an article is published we post the peer reviewers' comments and the authors' responses online. We also post the versions of the paper that were used during peer review. These are the versions that the peer review comments apply to.

The versions of the paper that follow are the versions that were submitted during the peer review process. They are not the versions of record or the final published versions. They should not be cited or distributed as the published version of this manuscript.

BMJ Open is an open access journal and the full, final, typeset and author-corrected version of record of the manuscript is available on our site with no access controls, subscription charges or pay-per-view fees (<http://bmjopen.bmj.com>).

If you have any questions on BMJ Open's open peer review process please email [info.bmjopen@bmj.com](mailto:info.bmjopen@bmj.com)

# BMJ Open

**The prevalence and incidence of myalgic encephalomyelitis/chronic fatigue syndrome in Europe: the EURO-epiME study from the European network EUROMENE. A protocol for a systematic review.**

|                               |                                                                                                                                                                                                                                                                                                                                                                                                                                                                                                                                                                                                                                                                                                                                                                                                                                                                                                                                                                                                                                                                                                                                                                                                                                                                                                                                                                                                                                                                                                                                         |
|-------------------------------|-----------------------------------------------------------------------------------------------------------------------------------------------------------------------------------------------------------------------------------------------------------------------------------------------------------------------------------------------------------------------------------------------------------------------------------------------------------------------------------------------------------------------------------------------------------------------------------------------------------------------------------------------------------------------------------------------------------------------------------------------------------------------------------------------------------------------------------------------------------------------------------------------------------------------------------------------------------------------------------------------------------------------------------------------------------------------------------------------------------------------------------------------------------------------------------------------------------------------------------------------------------------------------------------------------------------------------------------------------------------------------------------------------------------------------------------------------------------------------------------------------------------------------------------|
| Journal:                      | <i>BMJ Open</i>                                                                                                                                                                                                                                                                                                                                                                                                                                                                                                                                                                                                                                                                                                                                                                                                                                                                                                                                                                                                                                                                                                                                                                                                                                                                                                                                                                                                                                                                                                                         |
| Manuscript ID                 | bmjopen-2017-020817                                                                                                                                                                                                                                                                                                                                                                                                                                                                                                                                                                                                                                                                                                                                                                                                                                                                                                                                                                                                                                                                                                                                                                                                                                                                                                                                                                                                                                                                                                                     |
| Article Type:                 | Protocol                                                                                                                                                                                                                                                                                                                                                                                                                                                                                                                                                                                                                                                                                                                                                                                                                                                                                                                                                                                                                                                                                                                                                                                                                                                                                                                                                                                                                                                                                                                                |
| Date Submitted by the Author: | 20-Dec-2017                                                                                                                                                                                                                                                                                                                                                                                                                                                                                                                                                                                                                                                                                                                                                                                                                                                                                                                                                                                                                                                                                                                                                                                                                                                                                                                                                                                                                                                                                                                             |
| Complete List of Authors:     | <p>Estévez-López, Fer; University of Granada, Department of Physical Education and Sport, Faculty of Sport Sciences; Utrecht University, Department of Psychology, Faculty of Social and Behavioural Sciences<br/>         Castro-Marrero, Jesus; Vall d'Hebron University Hospital, CFS/ME Unit, Universitat Autònoma de Barcelona<br/>         Wang, Xia; University of East Anglia<br/>         Bakken, Inger Johanne; Norwegian Institute of Public Health<br/>         Ivanovs, Andrejs; Rigas Stradinas Universitate<br/>         Nacul, Luis ; London School of Hygiene and Tropical Medicine<br/>         Sepulveda, Nuno; London School of Hygiene and Tropical Medicine<br/>         Strand, Elin; Oslo universitetssykehus Ullevål<br/>         Pheby, Derek; Buckinghamshire New University<br/>         Alegre, Jose; Vall d'Hebron University Hospital, CFS/ME Unit, Universitat Autònoma de Barcelona<br/>         Scheibenbogen, Carmen; Charite - Universitätsmedizin Berlin Institut für Medizin- Pflegepädagogik und Pflegewissenschaft<br/>         Shikova-Lekova, Evelina; Natsionalen tsentar po zarazni i parazitni bolesti<br/>         Lorusso, Lorenzo; A.S.S.T. della Franciacorta<br/>         Capelli, Enrica; Università degli Studi di Pavia Facoltà di Medicina e Chirurgia<br/>         Slobodan, Sekulic; Univerzitet u Novom Sadu Medicinski Fakultet<br/>         Lacerda, Eliana; London School of Hygiene &amp; Tropical Medicine<br/>         Murovska, Modra; Rigas Stradinas Universitate</p> |
| Keywords:                     | EPIDEMIOLOGY, EUROMENE, EURO-epiME, incidence, prevalence                                                                                                                                                                                                                                                                                                                                                                                                                                                                                                                                                                                                                                                                                                                                                                                                                                                                                                                                                                                                                                                                                                                                                                                                                                                                                                                                                                                                                                                                               |
|                               |                                                                                                                                                                                                                                                                                                                                                                                                                                                                                                                                                                                                                                                                                                                                                                                                                                                                                                                                                                                                                                                                                                                                                                                                                                                                                                                                                                                                                                                                                                                                         |

SCHOLARONE™  
Manuscripts

1  
2  
3 **The prevalence and incidence of myalgic encephalomyelitis/chronic fatigue**  
4 **syndrome in Europe: the EURO-epiME study from the European network**  
5  
6 **EUROMENE. A protocol for a systematic review.**  
7  
8  
9

10  
11 Fernando Estévez-López<sup>1</sup>, Jesús Castro-Marrero<sup>2</sup>, Xia Wang<sup>3</sup>, Inger J Bakken<sup>4</sup>, Andrejs  
12 Ivanovs<sup>5</sup>, Luis Nacul<sup>6</sup>, Nuno Sepulveda<sup>6</sup>, Elin B Strand<sup>7</sup>, Derek Pheby<sup>8</sup>, Jose Alegre<sup>2</sup>,  
13 Carmen Scheibenbogen<sup>9</sup>, Evelina Shikova-Lekova<sup>10</sup>, Lorenzo Lorusso<sup>11</sup>, Enrica  
14 Capelli<sup>12</sup>, Sekulic Slobodan<sup>13</sup>, Eliana Lacerda<sup>6,\*</sup>, Modra Murovska<sup>14,\*</sup>  
15  
16  
17  
18  
19  
20  
21

22 <sup>1</sup>Department of Psychology, Faculty of Social and Behavioural Sciences, Utrecht  
23 University, Utrecht, The Netherlands; and Department of Physical Education and Sport,  
24 Faculty of Sport Sciences, University of Granada, Granada, Spain; <sup>2</sup>Vall d'Hebron  
25 University Hospital, CFS/ME Unit, Universitat Autònoma de Barcelona, Barcelona,  
26 Spain; <sup>3</sup>Norwich Medical School, University of East Anglia, Norwich, UK; <sup>4</sup>Norwegian  
27 Institute of Public Health, Oslo, Norway; <sup>5</sup>Statistics Unit, Riga Stradins University,  
28 Latvia; <sup>6</sup>Department of Nutrition and Public Health Interventions Research, London  
29 School of Hygiene & Tropical Medicine, London, UK; <sup>7</sup>Oslo University Hospital, Oslo,  
30 Norway; <sup>8</sup>Faculty of Health and Society, Buckinghamshire New University, High  
31 Wycombe, UK; <sup>9</sup>Institute for Medical Immunology, Charité-Universitätsmedizin Berlin,  
32 Berlin, Germany; <sup>10</sup>Department of Virology, National Center of Infectious and Parasitic  
33 Diseases, Sofia, Bulgaria; <sup>11</sup>A.S.S.T. della Franciacorta, Chiari, Italy; <sup>12</sup>Department of  
34 Earth and Environmental Sciences, University of Pavia, Pavia, Italy; Medical Faculty  
35 Novi Sad, University of Novi Sad, Novi Sad, Serbia; <sup>14</sup>August Kirchenstein Institute of  
36 Microbiology and Virology, Riga Stradins University, Riga, Latvia.  
37  
38  
39  
40  
41  
42  
43  
44  
45  
46  
47  
48  
49  
50  
51  
52  
53

54 \* E Lacerda and M Murovska equally contributed to this work.  
55  
56  
57  
58  
59  
60

1  
2  
3 **Correspondence concerning this article should be addressed to:** Fernando Estévez-  
4 López, Postdoctoral researcher, Department of Psychology, Faculty of Social and  
5 Behavioural Sciences, Utrecht University, Utrecht, The Netherlands. Postal address:  
6  
7 Heidelberglaan 1, 3584 CS, Utrecht, The Netherlands. Phone: (+31) 30 253 4700.  
8  
9 Email: F.Estevez-Lopez@uu.nl  
10  
11  
12

13 **Running head:** Protocol of the EURO-epiMe study  
14  
15  
16  
17  
18  
19  
20  
21  
22  
23  
24  
25  
26  
27  
28  
29  
30  
31  
32  
33  
34  
35  
36  
37  
38  
39  
40  
41  
42  
43  
44  
45  
46  
47  
48  
49  
50  
51  
52  
53  
54  
55  
56  
57  
58  
59  
60

## ABSTRACT

**Introduction.** Myalgic Encephalomyelitis/Chronic Fatigue Syndrome (ME/CFS) is characterized by severe fatigue lasting for at least 6 months. Studies on ME/CFS in Europe only include single countries and, therefore, the prevalence and incidence of ME/CFS in Europe (as a whole) is unknown. One of the purposes of the European Network on ME/CFS (EUROMENE; EU-funded COST Action; Reference number: 15111) is to address this gap in knowledge. We will systematically review the literature reporting figures from European countries to provide a robust summary and identify new challenges.

**Methods and analysis.** We will systematically search the literature databases Scopus, PubMed, and Web of Science. No language or year of publication restriction will be applied. Two independent reviewers will search, screen, and select studies as well as extract data about their main characteristics and evaluate their methodological and reporting quality. When disagreements emerge, the reviewers will discuss to reach a consensus. We plan to produce a narrative summary of our findings as we anticipate that studies are scarce and heterogeneous. The possibility of performing meta-analyses will be discussed in a EUROMENE meeting (i.e., February 8, 2018, in Sofia, Bulgaria).

**Ethics and dissemination.** Ethical approval is not required as only publicly available data will be included. Findings will be described in EUROMENE reports, published in peer-reviewed journal(s), and presented at conferences. The findings will be also communicated to policymakers, healthcare providers, people with ME/CFS and other sections of society through regular channels including the mass-media.

**PROSPERO registration number:** CRD42017078688.

## STRENGTHS AND LIMITATIONS OF THIS STUDY

- To our knowledge, this will be the first review on the prevalence and incidence of myalgic encephalomyelitis/chronic fatigue syndrome (ME/CFS) in Europe.
- We will include validated ME/CFS case definitions and the whole lifespan. Studies based on self-report will be excluded.
- A potential limitation of this review is the possible small number of studies available and their high heterogeneity.
- This review will identify new challenges in the field, and will indicate whether more data on the prevalence and incidence of ME/CFS in Europe as a whole or in single countries are required.

## INTRODUCTION

Myalgic encephalomyelitis/chronic fatigue syndrome (ME/CFS) has heterogeneous clinical features and is characterized by severe fatigue lasting for at least 6 months, that is medically unexplained and not relieved by resting [1]. Consequently, ME/CFS often imposes a huge burden on daily life with negative impacts on health-related quality of life, labour status, and social and familial relationships [2–4]. Societal disbeliefs may add to the burden for people with ME/CFS [3,5].

For several reasons, ME/CFS is a challenge for scientists. Firstly, to date, the features of ME/CFS are poorly defined. For instance, an intense physical discomfort (i.e., malaise) along with flares of ME/CFS symptoms (lasting for longer than 24 hours) is observed after physical exertion [6]. However, whether post-exertional malaise is a distinctive feature of ME/CFS is not yet fully agreed [7]. Secondly, related to the lack of consensus on its defining features, a large number of disparate criteria for the diagnosis of ME/CFS are currently used worldwide [8]. Indeed, the most common scenario is to diagnose ME/CFS after exclusion of other diseases [9–11,4,12,13]. Thirdly, as different diagnostic criteria are used, ME/CFS prevalence and incidence figures are highly variable across studies. For instance, within an Icelandic study [14], the prevalence of ME/CFS ranged from 0 to 5% by means of the Lloyd et al [15] or Holmes et al [16] criteria.

To address the above-mentioned caveats and others it is imperative to understand comprehensively ME/CFS. With this purpose, the European Network on ME/CFS (EUROMENE) was established. This (EU-funded COST Action; Reference number: 15111) multidisciplinary network involves patients, stakeholders, researchers, clinicians, and industry. We intend to align ME/CFS research within the established landscape of European biomedical research by developing additional proposals to the

1  
2  
3 new H2020 and further Framework programme collaborative research projects. Further  
4 information about the EUROMENE network is available at:  
5 [http://www.cost.eu/COST\\_Actions/ca/CA15111](http://www.cost.eu/COST_Actions/ca/CA15111) and <http://www.euromene.eu/>.  
6  
7

8  
9 EUROMENE consists of six coordinated working groups. Working group 1  
10 focuses on the epidemiology of ME/CFS and leads the EUROpean Epidemiological  
11 Study for ME/CFS (EURO-EpiME study). One specific aim of this study is to estimate  
12 the prevalence and incidence of ME/CFS in Europe. As a first step, we will  
13 systematically review the available literature from European countries in order to  
14 provide a robust summary and identify new challenges on the field. It seems likely that  
15 more data on the prevalence and incidence of ME/CFS will be needed, both for Europe  
16 as a whole and within the European countries. Previously, systematic reviews have been  
17 conducted including studies from many parts of the world [17–19]. However, these  
18 previous reviews: (i) were conducted more than 5 years ago [20], (ii) did not report the  
19 incidence of ME/CFS, and (iii) did not include children or adolescents.  
20  
21  
22  
23  
24  
25  
26  
27  
28  
29  
30  
31

### 32 **Objective**

33  
34 We aim to conduct a systematic review and, if possible, meta-analyses to determine the  
35 prevalence and incidence of ME/CFS in Europe.  
36  
37

### 38 **Review question**

- 39  
40  
41 1. What is the prevalence of ME/CFS in Europe?  
42  
43 2. What is the incidence of ME/CFS in Europe?  
44  
45  
46  
47  
48  
49  
50  
51  
52  
53  
54  
55  
56  
57  
58  
59  
60



## **METHODS**

### **Inclusion criteria**

1. Studies reporting the prevalence of ME/CFS irrespective of age groups.
2. Studies from European countries.
3. Studies in community or primary care settings.

### **Exclusion criteria**

1. Studies without primary data (e.g., reviews).
2. Studies conducted in biased samples (e.g., vaccines, virus infection, veterans).
3. Studies based on self-report of the diagnosis of ME/CFS.
4. Studies with an inappropriate case definition (i.e., either CFS-like illness or the Oxford criteria).
5. Duplicate reports. When populations are overlapping, the study with the largest sample size will be included.

No language or year of publication restriction will be applied.

### **Search strategy for identifying relevant studies**

The search strategy will consist of two stages: a primary systematic literature search on three electronic databases and a complementary search.

#### ***The primary systematic literature search on electronic databases***

Two independent reviewers (F.E.-L. and J.C.-M.) will perform a primary electronic search in PubMed, Scopus and Web of Science on January 9, 2018. Table 1 shows the search strategy.

#### ***The complementary search***

We will conduct a twofold complementary search as follows: first, we will perform a backward- (by checking reference lists) and forward- (by checking citations) search of the works included in the present review; and second, grey literature will be addressed

1  
2  
3 by contacting – via email - all the members of EUROMENE to provide, if available,  
4 prevalence rates, incidence rates or both of ME/CFS in their countries according to  
5 national registers, publications in their own languages, or any other accessible source.  
6  
7

### 8 9 **Selection of studies for inclusion to the review**

10  
11 Two independent researchers (F.E.-L. and J.C.-M.) will screen records retrieved by the  
12 electronic search by titles/abstracts or full text of works for identifying potential studies  
13 and their suitability. When disagreements emerge between the two independent  
14 researchers, consensus will be obtained through discussion or when required, the  
15 opinion of a third researcher (I.J.B.) will be considered.  
16  
17  
18  
19  
20  
21

### 22 **Assessment of methodological quality and reporting of data**

23  
24 The methodological quality of the eligible studies will be evaluated with the Joanna  
25 Briggs Institute-Checklist for Prevalence Studies [21]. Before applying it, six members  
26 of the research team (i.e., F.E.-L., L.N., J.A., S.S., E.L., and M.M.) will develop an  
27 agreed appraisal of the tool. This appraisal will be published with the review as  
28 supplementary information. The reporting quality of the eligible studies will be  
29 evaluated using the observational studies in epidemiology (STROBE) checklist [22].  
30  
31 Two independent researchers (i.e., A.I. and X.W.) will evaluate the methodological and  
32 reporting quality of the included works. When controversies emerge, studies will be  
33 discussed with two other members of the team in order to reach a consensus (i.e., E.B.S.  
34 and D.P. for methodological and reporting quality, respectively). The quality  
35 assessment will be considered when discussing the findings.  
36  
37  
38  
39  
40  
41  
42  
43  
44  
45  
46  
47

### 48 **Data extraction and management**

49  
50 To manage the retrieved records from the electronic search, we will use the Mendeley  
51 Desktop. Two independent researchers (F.E.-L. and A.I.) will extract the following  
52 relevant data from the included studies: reference (authors and year of publication),  
53  
54  
55  
56  
57  
58  
59  
60

1  
2  
3 country (city or region when relevant), design (i.e., general population online survey),  
4 total sample size ( $n$  and % of women), age range, setting (e.g., primary care), case  
5 definition (i.e., diagnosis criteria), dates of data collection, overall prevalence or  
6 incidence and prevalence or incidence by gender and age groups (when available).  
7  
8 When discrepancies emerge in the coding between the two researchers results will be  
9 discussed with two other members of the team (i.e., N.S.) to reach a consensus.  
10  
11  
12  
13  
14

### 15 **Data synthesis and analysis**

16  
17 We anticipate that studies on the prevalence and incidence of ME/CFS in Europe will  
18 prove to be scarce and heterogeneous. The preliminary findings of the review will be  
19 presented in a EUROMENE meeting (i.e., February 8, 2018, in Sofia, Bulgaria) where  
20 we will discuss the appropriateness of performing meta-analyses.  
21  
22  
23  
24  
25

26 A narrative (descriptive) synthesis is planned if meta-analyses are not feasible.

27  
28 We will pay special attention to possible factors related to heterogeneity of the findings  
29 (e.g., diagnostic criteria, quality of the study) in order to find patterns that should be  
30 considered in future research. Attention will be also paid to the characteristics of the  
31 studied populations (e.g., age group, gender).  
32  
33  
34  
35  
36

37 We will undertake meta-analyses only where pooling of quantitative data is possible.  
38  
39 The meta regression analysis will be performed to investigate the sources of  
40 heterogeneity of any ME/CFS pooled prevalence estimate.  
41  
42  
43

### 44 **Presentation and reporting of results**

45  
46 We will report the findings of the present literature review in accordance with the  
47 preferred reporting items for systematic reviews and meta-analyses (i.e., the PRISMA  
48 statement [23]). A flow diagram (Figure 1) will illustrate the process of study selection  
49 from retrieved records to included studies. For transparency purposes, supplementary  
50 files will show which studies were excluded at every stage of the review.  
51  
52  
53  
54  
55  
56  
57  
58  
59  
60

1  
2  
3 In accordance with the data extraction, a table will show the main characteristics of the  
4  
5 studies included. Information on the quality of the methodology and reporting of the  
6  
7 studies will also be available.  
8

9  
10 If meta-analyses are performed, we plan using comprehensive meta-analysis  
11  
12 (CMS) to combine data of prevalence or incidence from different studies to estimate the  
13  
14 mean effect. We will select an appropriate model in terms of studies that we include and  
15  
16 calculate pooled ME/CFS prevalence and incidence. We will compare the results of  
17  
18 random-effects and fixed-effect meta-analyses in sensitivity analyses.  
19

### 20 **Ethics and dissemination**

21  
22 As systematic reviews use publicly available data, no formal ethical review and  
23  
24 approval is needed. The findings of this systematic review will address a specific aim of  
25  
26 the European network EUROMENE (i.e., to summarise the available data of the  
27  
28 prevalence and incidence of ME/CFS in Europe). The findings will be included in  
29  
30 EUROMENE reports and published in a paper in a peer-reviewed journal and presented  
31  
32 at conferences and meetings.  
33

34  
35 The findings of the present systematic review will be widely communicated to  
36  
37 society using mass media (e.g., interviews on radio, newspaper, television and the  
38  
39 Internet). Since our findings may have an impact on policy and healthcare practice, we  
40  
41 will also present them to policymakers and healthcare providers. We will present our  
42  
43 findings to patients with ME/CFS (e.g., by direct communication with representative  
44  
45 patient organisations, and by giving talks to local associations of people with ME/CFS).  
46  
47  
48  
49  
50  
51  
52  
53  
54  
55  
56  
57  
58  
59  
60

## **AUTHORS' CONTRIBUTIONS**

FE-L, JC-M, XW, EL, and MM designed the protocol. FE-L drafted the manuscript. FE-L, JC-M, XW, IJB, AI, LN, NS, EBS, DP, JA, CS, ES-L, LL, EC, SS, EL, MM revised and approved the final version of the manuscript. MM and EL are the chair and vice chair of the EUROMENE action, respectively.

## **ACKNOWLEDGMENTS**

The present protocol of systematic review was agreed in a EUROMENE meeting in Belgrade (Serbia) on September 7, 2017. We thank all the participants for their active participation and valuable suggestions.

## **FUNDING**

This work was supported by the COST (Action CA 15111: The European Network on Myalgic Encephalomyelitis/Chronic Fatigue Syndrome (EUROMENE), the Spanish Ministry of Economy and Competitiveness [BES-2014-067612 to F.E.-L.], the Bulgarian National Science Fund [ДКООТ 01/9 to E.S.]. The funders of the present study did not have any role in the design, decision to publish, or preparation of the protocol.

**Competing interests:** None declared.

**REFERENCES**

- 1 Carruthers B, Jain AK, De Meirleir KL, Peterson DL, Klimas NG LA. Myalgic encephalomyelitis/chronic fatigue syndrome: clinical working case definition, diagnostic and treatment protocols. *J Chronic Fatigue Syndrome* 2003;**11**:7–115.
- 2 Lowry TJ, Pakenham KI. Health-related quality of life in chronic fatigue syndrome: Predictors of physical functioning and psychological distress. *Psychol Health Med* 2008;**13**:222–38. doi:10.1080/13548500701335698
- 3 de Carvalho Leite JC, de L Drachler M, Killeit A, *et al.* Social support needs for equity in health and social care: a thematic analysis of experiences of people with chronic fatigue syndrome/myalgic encephalomyelitis. *Int J Equity Health* 2011;**10**:46. doi:10.1186/1475-9276-10-46
- 4 Nacul LC, Lacerda EM, Campion P, *et al.* The functional status and well being of people with myalgic encephalomyelitis/chronic fatigue syndrome and their carers. *BMC Public Health* 2011;**11**:402. doi:10.1186/1471-2458-11-402
- 5 Raine R, Carter S, Sensky T, *et al.* General practitioners' perceptions of chronic fatigue syndrome and beliefs about its management, compared with irritable bowel syndrome: qualitative study. *BMJ* 2004;**328**:1354–7. doi:10.1136/bmj.38078.503819.EE
- 6 McManimen SL, Sunnquist ML, Jason LA. Deconstructing post-exertional malaise: An exploratory factor analysis. *J Health Psychol* 2016;**35**:1359105316664139. doi:10.1177/1359105316664139
- 7 Jason LA, Evans M, So S, *et al.* Problems in defining post-exertional malaise. *J Prev Interv Community* 2015;**43**:20–31. doi:10.1080/10852352.2014.973239
- 8 Nacul L, Lacerda EM, Kingdon CC, *et al.* How have selection bias and disease misclassification undermined the validity of myalgic encephalomyelitis/chronic

- 1  
2  
3 fatigue syndrome studies? *J Health Psychol* 2017;:1359105317695803.  
4  
5 doi:10.1177/1359105317695803  
6
- 7 9 Fukuda K, Straus SE, Hickie I, *et al.* The chronic fatigue syndrome: a  
8  
9 comprehensive approach to its definition and study. International Chronic  
10  
11 Fatigue Syndrome Study Group. *Ann Intern Med* 1994;**121**:953–9.  
12  
13 doi:10.7326/0003-4819-121-12-199412150-00009  
14
- 15 10 Carruthers BM, van de Sande MI, De Meirleir KL, *et al.* Myalgic  
16  
17 encephalomyelitis: International Consensus Criteria. *J Intern Med* 2011;**270**:327–  
18  
19 38. doi:10.1111/j.1365-2796.2011.02428.x  
20  
21
- 22 11 Krumina A, Vasiljeva G, Ivanovs A, *et al.* Assessment of Value of Fatigue  
23  
24 Severity and Symptoms in Patients with Chronic Fatigue Syndrome/Myalgic  
25  
26 Encephalomyelitis and Fibromyalgia. *Br J Med Med Res* 2014;**4**:5866–77.  
27  
28 doi:10.9734/BJMMR/2014/12225  
29  
30
- 31 12 Reeves WC, Lloyd A, Vernon SD, *et al.* Identification of ambiguities in the 1994  
32  
33 chronic fatigue syndrome research case definition and recommendations for  
34  
35 resolution. *BMC Health Serv Res* 2003;**3**:25. doi:10.1186/1472-6963-3-25  
36  
37
- 38 13 Arpino C, Carrieri MP, Valesini G, *et al.* Idiopathic chronic fatigue and chronic  
39  
40 fatigue syndrome: a comparison of two case-definitions. *Ann Ist Super Sanita*  
41  
42 1999;**35**:435–41. <http://www.ncbi.nlm.nih.gov/pubmed/10721210> (accessed 6  
43  
44 Nov2017).  
45
- 46 14 Líndal E, Stefánsson JG, Bergmann S. The prevalence of chronic fatigue  
47  
48 syndrome in Iceland - a national comparison by gender drawing on four different  
49  
50 criteria. *Nord J Psychiatry* 2002;**56**:273–7. doi:10.1080/08039480260242769  
51  
52
- 53 15 Lloyd AR, Wakefield D, Boughton C, *et al.* What is myalgic encephalomyelitis?  
54  
55 *Lancet (London, England)* 1988;**1**:1286–7. doi:10.1016/S0140-6736(88)92107-1  
56  
57  
58  
59  
60

- 1  
2  
3 16 Holmes GP, Kaplan JE, Gantz NM, *et al.* Chronic fatigue syndrome: a working  
4 case definition. *Ann Intern Med* 1988;**108**:387–9. doi:10.1059/0003-4819-108-3-  
5 387  
6  
7  
8  
9 17 Ranjith G. Epidemiology of chronic fatigue syndrome. *Occup Med (Lond)*  
10 2005;**55**:13–9. doi:10.1093/occmed/kqi012  
11  
12  
13 18 Dinos S, Khoshaba B, Ashby D, *et al.* A systematic review of chronic fatigue, its  
14 syndromes and ethnicity: prevalence, severity, co-morbidity and coping. *Int J*  
15 *Epidemiol* 2009;**38**:1554–70. doi:10.1093/ije/dyp147  
16  
17  
18  
19 19 Johnston S, Brenu EW, Staines DR, *et al.* The adoption of chronic fatigue  
20 syndrome/myalgic encephalomyelitis case definitions to assess prevalence: a  
21 systematic review. *Ann Epidemiol* 2013;**23**:371–6.  
22 doi:10.1016/j.annepidem.2013.04.003  
23  
24  
25  
26  
27  
28 20 Shojania KG, Sampson M, Ansari MT, *et al.* *Updating Systematic Reviews*.  
29 Agency for Healthcare Research and Quality (US) 2007.  
30 <http://www.ncbi.nlm.nih.gov/pubmed/20734512> (accessed 13 Oct2017).  
31  
32  
33  
34 21 Munn Z, Moola S, Lisy K, *et al.* Methodological guidance for systematic reviews  
35 of observational epidemiological studies reporting prevalence and cumulative  
36 incidence data. *Int J Evid Based Healthc* 2015;**13**:147–53.  
37 doi:10.1097/XEB.0000000000000054  
38  
39  
40  
41  
42  
43 22 von Elm E, Altman DG, Egger M, *et al.* The Strengthening the Reporting of  
44 Observational Studies in Epidemiology (STROBE) statement: guidelines for  
45 reporting observational studies. *Lancet (London, England)* 2007;**370**:1453–7.  
46 doi:10.1016/S0140-6736(07)61602-X  
47  
48  
49  
50  
51  
52 23 Moher D, Liberati A, Tetzlaff J, *et al.* Preferred reporting items for systematic  
53 reviews and meta-analyses: the PRISMA statement. *BMJ* 2009;**339**:b2535.  
54  
55  
56  
57  
58  
59  
60



1  
2  
3  
4  
5  
6  
7  
8  
9  
10  
11  
12  
13  
14  
15  
16  
17  
18  
19  
20  
21  
22  
23  
24  
25  
26  
27  
28  
29  
30  
31  
32  
33  
34  
35  
36  
37  
38  
39  
40  
41  
42  
43  
44  
45  
46  
47  
48  
49  
50  
51  
52  
53  
54  
55  
56  
57  
58  
59  
60

doi:10.1016/j.jcms.2010.11.001

For peer review only

1  
2  
3 Figure 1. Flow diagram for study selection

4  
5 WOS, web of science; ME/CFS, myalgic encephalomyelitis/chronic fatigue syndrome.  
6  
7  
8  
9  
10  
11  
12  
13  
14  
15  
16  
17  
18  
19  
20  
21  
22  
23  
24  
25  
26  
27  
28  
29  
30  
31  
32  
33  
34  
35  
36  
37  
38  
39  
40  
41  
42  
43  
44  
45  
46  
47  
48  
49  
50  
51  
52  
53  
54  
55  
56  
57  
58  
59  
60

For peer review only

Table 1. The primary systematic literature search strategy on the electronic databases

| Database       | Search terms combination                                                                                                                                                     |
|----------------|------------------------------------------------------------------------------------------------------------------------------------------------------------------------------|
| Scopus         | {epidemiology} OR {prevalence} OR {incidence}) AND ({chronic fatigue syndrome} OR {myalgic encephalomyelitis} OR (4) OR (5))                                                 |
| PubMed         | ("Fatigue Syndrome, Chronic"[Mesh] AND ("Incidence"[Mesh] OR "Epidemiology"[Mesh] OR "epidemiology" [Subheading]) OR "Prevalence"[Mesh] OR "Cross-Sectional Studies"[Mesh])) |
| Web of science | ("epidemiology" OR "prevalence" OR "incidence") AND ("chronic fatigue syndrome" OR "myalgic encephalomyelitis" OR "CFS/ME" OR "ME/CFS")                                      |

Mesh, medical subject headings

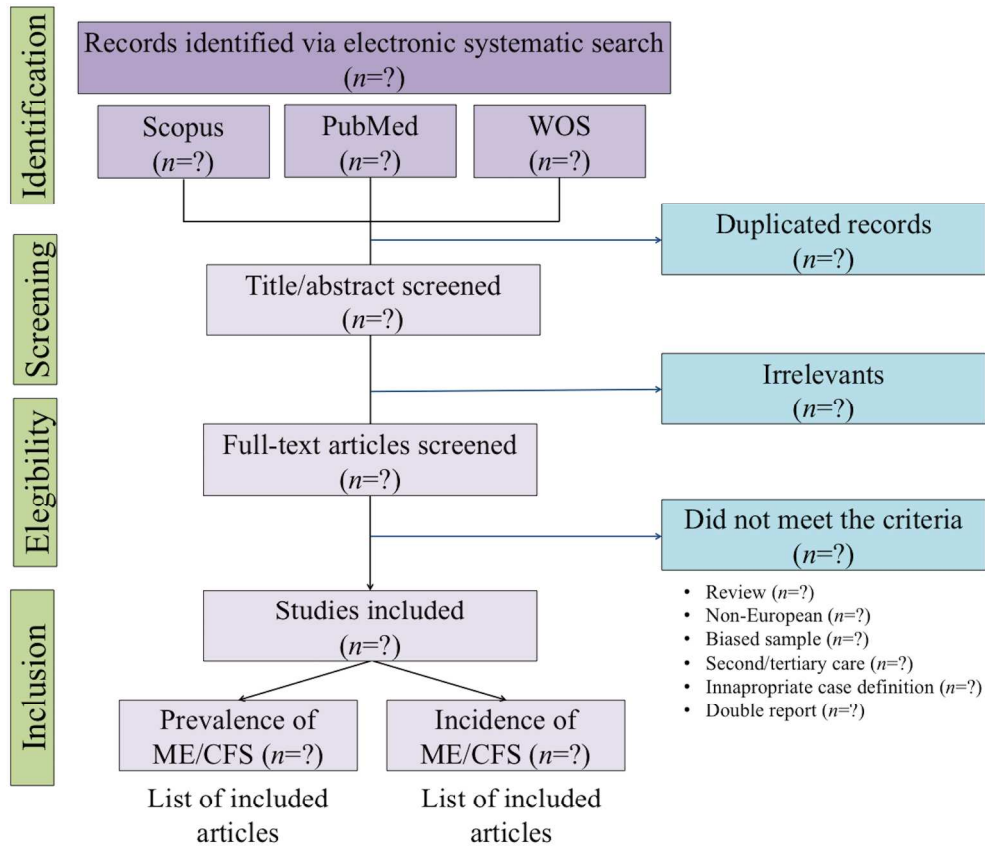

Figure 1. Flow diagram for study selection

423x423mm (300 x 300 DPI)

# BMJ Open

## The prevalence and incidence of Myalgic Encephalomyelitis/Chronic Fatigue Syndrome in Europe: the Euro-epiME study from the European network EUROMENE. A protocol for a systematic review.

|                                                                                                                                                                |                                                                                                                                                                                                                                                                                                                                                                                                                                                                                                                                                                                                                                                                                                                                                                                                                                                                                                                                                                                                                                                                                                                                                                                                                                                                                                                                                                                                                                                                                                                                                                                                                                        |
|----------------------------------------------------------------------------------------------------------------------------------------------------------------|----------------------------------------------------------------------------------------------------------------------------------------------------------------------------------------------------------------------------------------------------------------------------------------------------------------------------------------------------------------------------------------------------------------------------------------------------------------------------------------------------------------------------------------------------------------------------------------------------------------------------------------------------------------------------------------------------------------------------------------------------------------------------------------------------------------------------------------------------------------------------------------------------------------------------------------------------------------------------------------------------------------------------------------------------------------------------------------------------------------------------------------------------------------------------------------------------------------------------------------------------------------------------------------------------------------------------------------------------------------------------------------------------------------------------------------------------------------------------------------------------------------------------------------------------------------------------------------------------------------------------------------|
| Journal:                                                                                                                                                       | <i>BMJ Open</i>                                                                                                                                                                                                                                                                                                                                                                                                                                                                                                                                                                                                                                                                                                                                                                                                                                                                                                                                                                                                                                                                                                                                                                                                                                                                                                                                                                                                                                                                                                                                                                                                                        |
| Manuscript ID                                                                                                                                                  | bmjopen-2017-020817.R1                                                                                                                                                                                                                                                                                                                                                                                                                                                                                                                                                                                                                                                                                                                                                                                                                                                                                                                                                                                                                                                                                                                                                                                                                                                                                                                                                                                                                                                                                                                                                                                                                 |
| Article Type:                                                                                                                                                  | Protocol                                                                                                                                                                                                                                                                                                                                                                                                                                                                                                                                                                                                                                                                                                                                                                                                                                                                                                                                                                                                                                                                                                                                                                                                                                                                                                                                                                                                                                                                                                                                                                                                                               |
| Date Submitted by the Author:                                                                                                                                  | 22-Jun-2018                                                                                                                                                                                                                                                                                                                                                                                                                                                                                                                                                                                                                                                                                                                                                                                                                                                                                                                                                                                                                                                                                                                                                                                                                                                                                                                                                                                                                                                                                                                                                                                                                            |
| Complete List of Authors:                                                                                                                                      | <p>Estévez-López, Fer; University of Granada, Department of Physical Education and Sport, Faculty of Sport Sciences; Utrecht University, Department of Psychology, Faculty of Social and Behavioural Sciences<br/>         Castro-Marrero, Jesus; Vall d'Hebron University Hospital, CFS/ME Unit, Universitat Autònoma de Barcelona; Cornell University, Department of Molecular Biology and Genetics<br/>         Wang, Xia; University of East Anglia<br/>         Bakken, Inger Johanne; Norwegian Institute of Public Health<br/>         Ivanovs, Andrejs; Rigas Stradinas Universitate<br/>         Nacul, Luis ; London School of Hygiene and Tropical Medicine<br/>         Sepulveda, Nuno; London School of Hygiene and Tropical Medicine<br/>         Strand, Elin; Oslo universitetssykehus Ullevål<br/>         Pheby, Derek; Buckinghamshire New University<br/>         Alegre, Jose; Vall d'Hebron University Hospital, CFS/ME Unit, Universitat Autònoma de Barcelona<br/>         Scheibenbogen, Carmen; Charite - Universitätsmedizin Berlin Institut für Medizin- Pflegepädagogik und Pflegewissenschaft<br/>         Shikova-Lekova, Evelina; Natsionalen tsentar po zarazni i parazitni bolesti<br/>         Lorusso, Lorenzo; A.S.S.T. della Franciacorta<br/>         Capelli, Enrica; Università degli Studi di Pavia Facoltà di Medicina e Chirurgia<br/>         Slobodan, Sekulic; University of Novi Sad, Department of Neurology, Medical Faculty Novi Sad<br/>         Lacerda, Eliana; London School of Hygiene &amp; Tropical Medicine<br/>         Murovska, Modra; Rigas Stradinas Universitate</p> |
| <b>Primary Subject Heading</b>:                                                                                                                                | Public health                                                                                                                                                                                                                                                                                                                                                                                                                                                                                                                                                                                                                                                                                                                                                                                                                                                                                                                                                                                                                                                                                                                                                                                                                                                                                                                                                                                                                                                                                                                                                                                                                          |
| Secondary Subject Heading:                                                                                                                                     | Epidemiology                                                                                                                                                                                                                                                                                                                                                                                                                                                                                                                                                                                                                                                                                                                                                                                                                                                                                                                                                                                                                                                                                                                                                                                                                                                                                                                                                                                                                                                                                                                                                                                                                           |
| Keywords:                                                                                                                                                      | EPIDEMIOLOGY, EUROMENE, EURO-epiME, incidence, prevalence                                                                                                                                                                                                                                                                                                                                                                                                                                                                                                                                                                                                                                                                                                                                                                                                                                                                                                                                                                                                                                                                                                                                                                                                                                                                                                                                                                                                                                                                                                                                                                              |
| <p>Note: The following files were submitted by the author for peer review, but cannot be converted to PDF. You must view these files (e.g. movies) online.</p> |                                                                                                                                                                                                                                                                                                                                                                                                                                                                                                                                                                                                                                                                                                                                                                                                                                                                                                                                                                                                                                                                                                                                                                                                                                                                                                                                                                                                                                                                                                                                                                                                                                        |

1  
2  
3  
4  
5  
6  
7  
8  
9  
10  
11  
12  
13  
14  
15  
16  
17  
18  
19  
20  
21  
22  
23  
24  
25  
26  
27  
28  
29  
30  
31  
32  
33  
34  
35  
36  
37  
38  
39  
40  
41  
42  
43  
44  
45  
46  
47  
48  
49  
50  
51  
52  
53  
54  
55  
56  
57  
58  
59  
60

20180507PRISMA-P-checklist.doc

SCHOLARONE™  
Manuscripts

For peer review only

1  
2  
3 **1 The prevalence and incidence of Myalgic Encephalomyelitis/Chronic Fatigue**  
4  
5 **2 Syndrome in Europe: the Euro-epiME study from the European network**  
6  
7 **3 EUROMENE. A protocol for a systematic review.**  
8  
9  
10

11 Fernando Estévez-López<sup>1</sup>, Jesús Castro-Marrero<sup>2</sup>, Xia Wang<sup>3</sup>, Inger J Bakken<sup>4</sup>, Andrejs  
12 Ivanovs<sup>5</sup>, Luis Nacul<sup>6</sup>, Nuno Sepulveda<sup>6</sup>, Elin B Strand<sup>7</sup>, Derek Pheby<sup>8</sup>, Jose Alegre<sup>9</sup>,  
13 Carmen Scheibenbogen<sup>10</sup>, Evelina Shikova-Lekova<sup>11</sup>, Lorenzo Lorusso<sup>12</sup>, Enrica  
14 Capelli<sup>13</sup>, Slobodan Sekulic<sup>14</sup>, Eliana Lacerda<sup>6,\*</sup>, Modra Murovska<sup>15,\*</sup>, on behalf of the  
15 European Network on ME/CFS (EUROMENE)  
16  
17  
18  
19  
20  
21  
22  
23

24 <sup>1</sup>Department of Psychology, Faculty of Social and Behavioural Sciences, Utrecht  
25 University, Utrecht, The Netherlands; Department of Physical Education and Sport,  
26 Faculty of Sport Sciences, University of Granada, Granada, Spain; and School of Health  
27 Sciences, Ulster University, Northern Ireland, UK; <sup>2</sup>Vall d'Hebron University Hospital,  
28 CFS/ME Unit, Universitat Autònoma de Barcelona, Barcelona, Spain; and Department  
29 of Molecular Biology and Genetics, Cornell University, Ithaca, NY, USA; <sup>3</sup>Norwich  
30 Medical School, University of East Anglia, Norwich, UK; <sup>4</sup>Norwegian Institute of  
31 Public Health, Oslo, Norway; <sup>5</sup>Statistics Unit, Riga Stradins University, Latvia; <sup>6</sup>  
32 Department of Nutrition and Public Health Interventions Research, London School of  
33 Hygiene & Tropical Medicine, London, UK; <sup>7</sup>National Advisory Unit on CFS/ME, Oslo  
34 University Hospital, Oslo, Norway; <sup>8</sup>Faculty of Health and Society, Buckinghamshire  
35 New University, High Wycombe, UK; <sup>9</sup>Vall d'Hebron University Hospital, CFS/ME  
36 Unit, Universitat Autònoma de Barcelona, Barcelona, Spain; <sup>10</sup>Institute for Medical  
37 Immunology, Charité-Universitätsmedizin Berlin, Berlin, Germany; <sup>11</sup>Department of  
38 Virology, National Center of Infectious and Parasitic Diseases, Sofia, Bulgaria;  
39  
40  
41  
42  
43  
44  
45  
46  
47  
48  
49  
50  
51  
52  
53  
54  
55  
56  
57  
58  
59  
60

1  
2  
3 26 <sup>12</sup>A.S.S.T. della Franciacorta, Chiari, Italy; <sup>13</sup>Department of Earth and Environmental  
4  
5 27 Sciences, University of Pavia, Pavia, Italy; <sup>14</sup>Department of Neurology, Medical Faculty  
6  
7 28 Novi Sad, University of Novi Sad, Serbia; <sup>15</sup>August Kirchenstein Institute of  
8  
9 29 Microbiology and Virology, Riga Stradins University, Riga, Latvia.  
10  
11  
12

13  
14 31 \* E Lacerda and M Murovska equally contributed to this work.  
15  
16  
17

18 33 **Correspondence concerning this article should be addressed to:** Fernando Estévez-  
19  
20 34 López, Postdoctoral researcher, Department of Psychology, Faculty of Social and  
21  
22 35 Behavioural Sciences, Utrecht University, Utrecht, The Netherlands. Postal address:  
23  
24 36 Heidelberglaan 1, 3584 CS, Utrecht, The Netherlands. Phone: (+31) 30 253 4700.  
25  
26 37 Email: [F.Estevez-Lopez@uu.nl](mailto:F.Estevez-Lopez@uu.nl)  
27  
28  
29

30  
31 39 **Running head:** Protocol of the Euro-epiMe study  
32  
33  
34  
35  
36  
37  
38  
39  
40  
41  
42  
43  
44  
45  
46  
47  
48  
49  
50  
51  
52  
53  
54  
55  
56  
57  
58  
59  
60



1  
2  
3 41 **ABSTRACT**

4 42 **Introduction.** Myalgic Encephalomyelitis/Chronic Fatigue Syndrome (ME/CFS) is a  
5  
6 43 chronic disease involving central nervous system and immune system disorders, as well  
7  
8 44 as cardiovascular abnormalities. ME/CFS is characterized by severe chronic fatigue  
9  
10 45 lasting for at least 6 months, including such clinical symptoms as tender cervical or  
11  
12 46 axillary lymph nodes, muscle pain, joint pain without swelling or redness, post-  
13  
14 47 exertional malaise for more than 24 hours, and un-refreshing sleep. Studies on the  
15  
16 48 epidemiology of ME/CFS in Europe only include single countries and, therefore, the  
17  
18 49 prevalence and incidence of ME/CFS in Europe (as a whole) is unknown. One of the  
19  
20 50 purposes of the European Network on ME/CFS (EUROMENE; EU-funded COST  
21  
22 51 Action; Reference number: 15111) is to address this gap in knowledge. We will  
23  
24 52 systematically review the literature reporting figures from European countries to  
25  
26 53 provide a robust summary and identify new challenges.

27  
28  
29 54 **Methods and analysis.** We will systematically search the literature databases Scopus,  
30  
31 55 PubMed, and Web of Science for studies published in the last 10 years (i.e., after 2007).  
32  
33 56 No language restriction will be applied. Two independent reviewers will search, screen,  
34  
35 57 and select studies as well as extract data about their main characteristics and evaluate  
36  
37 58 their methodological and reporting quality. When disagreements emerge, the reviewers  
38  
39 59 will discuss to reach a consensus. We plan to produce a narrative summary of our  
40  
41 60 findings as we anticipate that studies are scarce and heterogeneous. The possibility of  
42  
43 61 performing meta-analyses will be discussed in a EUROMENE meeting.

44  
45 62 **Ethics and dissemination.** Ethical approval is not required as only publicly available  
46  
47 63 data will be included. Findings will be described in EUROMENE reports, published in  
48  
49 64 peer-reviewed journal(s), and presented at conferences. The findings will be also  
50  
51  
52  
53  
54  
55  
56  
57  
58  
59  
60

1  
2  
3  
4  
5  
6  
7  
8  
9  
10  
11  
12  
13  
14  
15  
16  
17  
18  
19  
20  
21  
22  
23  
24  
25  
26  
27  
28  
29  
30  
31  
32  
33  
34  
35  
36  
37  
38  
39  
40  
41  
42  
43  
44  
45  
46  
47  
48  
49  
50  
51  
52  
53  
54  
55  
56  
57  
58  
59  
60

65 communicated to policymakers, healthcare providers, people with ME/CFS and other  
66 sections of society through regular channels including the mass-media.

67 **PROSPERO registration number:** CRD42017078688.

68  
69  
70  
71

For peer review only

## 72 **STRENGTHS AND LIMITATIONS OF THIS STUDY**

- 73 • The main strengths of this protocol rely on its carefully designed search strategy,  
74 inclusion and exclusion criteria, and time span coverage.
- 75 • The search strategy will address the potential EU studies published in non-English  
76 national languages, and we will include currently accepted ME/CFS case  
77 definitions, to minimise selection bias.
- 78 • Studies based on self-report will be excluded, and the search time of 10 years will  
79 enable us to picture the ME/CFS occurrence in Europe.
- 80 • The European Network on Myalgic Encephalomyelitis/Chronic Fatigue Syndrome  
81 (EUROMENE), a network of established researchers on ME/CFS, will conduct the  
82 proposed systematic review, which can increase credibility and reliability of the  
83 findings.
- 84 • A potential limitation of this review may be a small number of studies available and  
85 their potential high heterogeneity.

86

87

## 88 INTRODUCTION

89 Myalgic Encephalomyelitis/Chronic Fatigue Syndrome (ME/CFS) has heterogeneous  
90 clinical features and is characterized by severe fatigue lasting for at least 6 months, that  
91 is medically unexplained and not relieved by resting [1]. Consequently, ME/CFS often  
92 imposes a huge burden on daily life with negative impacts on health-related quality of  
93 life, labour status, and social and familial relationships [2–4]. Societal disbeliefs may  
94 add to the burden for people with ME/CFS [3,5].

95 For several reasons, ME/CFS is a challenge for scientists. Firstly, to date, the  
96 features of ME/CFS have been poorly defined. For instance, an intense physical  
97 discomfort (i.e., malaise) along with flares of ME/CFS symptoms (lasting for longer  
98 than 24 hours) is observed after minimum physical exertion [6]. However, whether  
99 post-exertional malaise is a distinctive feature of ME/CFS is not yet fully agreed [7].  
100 Secondly, related to the lack of consensus on its defining features, a large number of  
101 disparate criteria for the diagnosis of ME/CFS are currently used worldwide [8]. Indeed,  
102 the most common scenario is to diagnose ME/CFS after exclusion of other diseases  
103 [4,9–13]. Thirdly, as different diagnostic criteria are used, ME/CFS prevalence and  
104 incidence figures are highly variable across studies. For instance, within an Icelandic  
105 study [14], the prevalence of ME/CFS ranged from 0 to 5% by means of the Lloyd et al  
106 [15] or Holmes et al [16] criteria, respectively.

107 To address the above-mentioned caveats and others it is imperative to  
108 understand comprehensively ME/CFS. With this purpose, the European Network on  
109 ME/CFS (EUROMENE) was established. This (EU-funded COST Action; Reference  
110 number: 15111) multidisciplinary network involves patients, stakeholders, researchers,  
111 clinicians, and industry. We intend to align ME/CFS research within the established  
112 landscape of European biomedical research by developing additional proposals to the

1  
2  
3 113 new H2020 and further Framework programme collaborative research projects. Further  
4  
5 114 information about the EUROMENE network is available at:  
6  
7 115 [http://www.cost.eu/COST\\_Actions/ca/CA15111](http://www.cost.eu/COST_Actions/ca/CA15111) and <http://www.euromene.eu/>.

8  
9 116 EUROMENE consists of six closely coordinated working groups. Working  
10  
11 117 group 1 focuses on the epidemiology of ME/CFS and leads the European  
12  
13 118 Epidemiological Study for ME/CFS (Euro-EpiME study). One specific aim of this study  
14  
15 119 is to estimate the prevalence and incidence of ME/CFS in Europe. As a first step, we  
16  
17 120 will systematically review the available literature from European countries in order to  
18  
19 121 provide a robust summary and identify new challenges on the field. It seems likely that  
20  
21 122 more data on the prevalence and incidence of ME/CFS will be needed, both for Europe  
22  
23 123 as a whole and within the European countries. Previously, systematic reviews have been  
24  
25 124 conducted including studies from many parts of the world [17–19]. However, these  
26  
27 125 previous reviews: (i) were conducted more than 5 years ago [20], (ii) did not report the  
28  
29 126 incidence of ME/CFS, and (iii) did not include children or adolescents.

### 30 31 32 33 127 **Objective**

34  
35 128 We aim to conduct a systematic review and, if possible, meta-analyses to determine the  
36  
37 129 prevalence and incidence of ME/CFS in Europe.

### 38 39 130 **Review question**

- 40  
41 131 1. What is the prevalence of ME/CFS in Europe?  
42  
43 132 2. What is the incidence of ME/CFS in Europe?  
44  
45

46 133  
47  
48  
49  
50  
51  
52  
53  
54  
55  
56  
57  
58  
59  
60

1  
2  
3 134 **METHODS**

4  
5 135 **Inclusion criteria**

6  
7 136 1. Studies reporting either the prevalence or incidence of ME/CFS, including any of  
8  
9 137 the following clinical diagnostic criteria – CDC-1994 [9], Canadian Consensus  
10  
11 138 Criteria [1], London Criteria [21], International Consensus Criteria [10], or Institute  
12  
13 139 of Medicine criteria [22], irrespective of age groups.

14  
15  
16 140 2. Studies from European countries.

17  
18 141 3. Studies in community or primary care settings.

19  
20 142 **Exclusion criteria**

21  
22 143 1. Studies without primary data (e.g., reviews).

23  
24 144 2. Studies conducted in biased samples (e.g., vaccines, virus infection, veterans).

25  
26 145 3. Studies based on self-report of the diagnosis of ME/CFS.

27  
28 146 4. Studies with an inappropriate case definition (e.g., CFS-like illness or other clinical  
29  
30 147 criteria, such as the Oxford criteria due to lack of specificity).

31  
32 148 5. Duplicate reports. When populations are overlapping, the study with the largest  
33  
34 149 sample size will be included.

35  
36 150 6. Studies published more than 10 years ago (i.e., before 2008)

37  
38 151 No language restriction will be applied.

39  
40  
41 152 **Search strategy for identifying relevant studies**

42  
43  
44 153 The search strategy will consist of two stages: a primary systematic literature search on  
45  
46 154 three electronic databases and a complementary search.

47  
48 155 ***The primary systematic literature search on electronic databases***

49  
50 156 Two independent reviewers (F.E.-L. and J.C.-M.) will perform a primary electronic  
51  
52 157 search in PubMed, Scopus and Web of Science on January 9, 2018. Table 1 shows the  
53  
54 158 search strategy.

1  
2  
3 159 ***The complementary search***

4  
5 160 We will conduct a twofold complementary search as follows: first, we will perform a  
6  
7 161 backward- (by checking reference lists) and forward- (by checking citations) search of  
8  
9 162 the works included in the present review; and second, grey literature will be addressed  
10  
11 163 by contacting – via email - all the members of EUROMENE to provide, if available,  
12  
13 164 prevalence rates, incidence rates or both of ME/CFS in their countries according to  
14  
15 165 national registers, publications in their own languages, or any other publicly accessible  
16  
17 166 source.

18  
19  
20 167 **Selection of studies for inclusion to the review**

21  
22 168 Two independent researchers (F.E.-L. and J.C.-M.) will screen records retrieved by the  
23  
24 169 electronic search by titles/abstracts or full text of works for identifying potential studies  
25  
26 170 and their suitability. When disagreements emerge between the two independent  
27  
28 171 researchers, consensus will be obtained through discussion or when required, the  
29  
30 172 opinion of a third researcher (I.J.B.) will be considered.

31  
32  
33 173 **Assessment of methodological quality and reporting of data**

34  
35 174 The methodological quality of the eligible studies will be evaluated with the Joanna  
36  
37 175 Briggs Institute-Checklist for Prevalence Studies [23]. Before applying it, six members  
38  
39 176 of the research team (i.e., F.E.-L., L.N., J.A., S.S., E.L., and M.M.) will develop an  
40  
41 177 agreed appraisal of the tool. This appraisal will be published with the review as  
42  
43 178 supplementary information. The reporting quality of the eligible studies will be  
44  
45 179 evaluated using the observational studies in epidemiology (STROBE) checklist [24].  
46  
47 180 Two independent researchers (i.e., A.I. and X.W.) will evaluate the methodological and  
48  
49 181 reporting quality of the included works. When controversies emerge, studies will be  
50  
51 182 discussed with two other members of the team in order to reach a consensus (i.e., E.B.S.  
52  
53  
54  
55  
56  
57  
58  
59  
60

1  
2  
3 183 and D.P. for methodological and reporting quality, respectively). The quality  
4  
5 184 assessment will be considered when discussing the findings.

### 6 7 185 **Data extraction and management**

8  
9 186 To manage the retrieved records from the electronic search, we will use the Mendeley  
10  
11 187 Desktop. Two independent researchers (F.E.-L. and A.I.) will extract the following  
12  
13 188 relevant data from the included studies: reference (authors and year of publication),  
14  
15 189 country (city or region when relevant), design (i.e., general population online survey),  
16  
17 190 total sample size (*n* and % of women, *n* and % of migrants), age range, setting (e.g.,  
18  
19 191 primary care), case definition (i.e., diagnosis criteria), dates of data collection, overall  
20  
21 192 prevalence and/or incidence and prevalence and/or incidence by gender and age groups  
22  
23 193 (when available). When discrepancies emerge in the coding between the two  
24  
25 194 researchers' results, these will be discussed with another members of the team (i.e.,  
26  
27 195 N.S.) to reach a consensus.

### 28 29 30 31 196 **Data synthesis and analysis**

32  
33 197 We anticipate that studies on the prevalence and incidence of ME/CFS in Europe will  
34  
35 198 prove to be scarce and heterogeneous. The preliminary findings of the review will be  
36  
37 199 presented in a EUROMENE meeting (i.e., September, 2018, in London, the UK) where  
38  
39 200 we will discuss the appropriateness of performing meta-analyses.

40  
41 201 A narrative (descriptive) synthesis is planned if meta-analyses are not feasible.  
42  
43 202 We will pay special attention to possible factors related to heterogeneity of the findings  
44  
45 203 in order to find patterns that should be considered in future research. For instance, we  
46  
47 204 will discuss whether the prevalence or incidence of ME/CFS differ according to the case  
48  
49 205 definition used to examine the figures. Attention will be also paid to the characteristics  
50  
51 206 of the studied populations (e.g., age group, gender).



1  
2  
3 207 We will undertake meta-analyses only where pooling of quantitative data is possible.  
4  
5 208 The meta regression analysis will be performed to investigate the sources of  
6  
7 209 heterogeneity of any ME/CFS pooled prevalence and incidence estimate. The  $I^2$  statistic  
8  
9 210 will be used to investigate the heterogeneity.  $I^2$  of 25%, 50%, and 75% will be appraised  
10  
11 211 as low, moderate, and high, respectively [25].

## 12 212 **Presentation and reporting of results**

13  
14  
15 213 We will report the findings of the present literature review in accordance with the  
16  
17 214 preferred reporting items for systematic reviews and meta-analyses (i.e., the PRISMA  
18  
19 215 statement [26]). A flow diagram (Figure 1) will illustrate the process of study selection  
20  
21 216 from retrieved records to included studies. For transparency purposes, supplementary  
22  
23 217 files will show which studies were excluded at every stage of the review. If the present  
24  
25 218 protocol needs amendments, they will be publicly available along with their rationale in  
26  
27 219 the EUROMENE website: <http://www.euromene.eu/>

28  
29  
30 220 In accordance with the data extraction, a table will show the main characteristics of the  
31  
32 221 studies included. Information on the quality of the methodology and reporting of the  
33  
34 222 studies will also be available.

35  
36  
37 223 If meta-analyses are performed, we plan using comprehensive meta-analysis  
38  
39 224 (CMS) to combine data of prevalence or incidence from different studies to estimate the  
40  
41 225 mean effect. We will select an appropriate model in terms of studies that we include and  
42  
43 226 calculate pooled ME/CFS prevalence and incidence. We will compare the results of  
44  
45 227 random-effects and fixed-effect meta-analyses in sensitivity analyses.

46  
47  
48 228

49  
50 229

51  
52 230

53  
54 231

1  
2  
3 232 **Ethics and dissemination**

4  
5 233 As systematic reviews use publicly available data, no formal ethical review and  
6  
7 234 approval is needed. The findings of this systematic review will address a specific aim of  
8  
9 235 the European network EUROMENE (i.e., to summarise the available data of the  
10  
11 236 prevalence and incidence of ME/CFS in Europe). The findings will be included in  
12  
13 237 EUROMENE reports published in paper(s) in peer-reviewed journal(s) and presented at  
14  
15 238 conferences and meetings.

16  
17  
18 239 The findings of the present systematic review will be widely communicated to  
19  
20 240 society using mass media (e.g., interviews on radio, newspaper, television and the  
21  
22 241 Internet). Since our findings may have an impact on policy and healthcare practice, we  
23  
24 242 will also present them to policymakers and healthcare providers.

25  
26 243 **Patient and public involvement**

27  
28 244 EUROMENE is multidisciplinary network cooperating with patient organizations via  
29  
30 245 Web platform. Patient organisations are benefiting from dedicated events, dedicated  
31  
32 246 printed media and interaction through social media. We will present our findings to  
33  
34 247 patients with ME/CFS (e.g., by direct communication with representative patient  
35  
36 248 organisations, and by giving talks to local associations of people with ME/CFS).  
37  
38 249 General public will be reached through the Action website, oral presentations and  
39  
40 250 interviews.

41  
42  
43 251

44  
45 252

46  
47 253

48  
49 254

50  
51 255

1  
2  
3 256 **AUTHORS' CONTRIBUTIONS**

4 257 FE-L, JC-M, XW, EL, and MM designed the protocol. FE-L drafted the manuscript.

5 258 FE-L, JC-M, XW, IJB, AI, LN, NS, EBS, DP, JA, CS, ES-L, LL, EC, SS, EL, MM

6  
7  
8  
9 259 revised and approved the final version of the manuscript. MM and EL are the chair and

10  
11 260 vice chair of the EUROMENE action, respectively. FE-L will be the guarantor of the

12  
13 261 review

14  
15 262 **ACKNOWLEDGMENTS**

16  
17 263 The present protocol of systematic review was agreed in a EUROMENE meeting in

18 264 Belgrade (Serbia) on September 7, 2017. We thank all the participants for their active

19  
20  
21 265 participation and valuable suggestions.

22  
23 266 **FUNDING**

24  
25 267 This work was supported by the COST (Action CA 15111: The European Network on

26  
27 268 Myalgic Encephalomyelitis/Chronic Fatigue Syndrome (EUROMENE), the Spanish

28  
29 269 Ministry of Economy and Competitiveness [BES-2014-067612 to F.E.-L.], the

30  
31 270 Bulgarian National Science Fund [ДКОСТ 01/9 to E.S.]. The funders of the present

32  
33 271 study did not have any role in the design, decision to publish, or preparation of the

34  
35 272 protocol.

36  
37  
38  
39 273

40  
41 274 **Competing interests:** None declared.

42  
43  
44 275

276 **REFERENCES**

- 277 1 Carruthers B, Jain AK, De Meirleir KL, Peterson DL, Klimas NG LA. Myalgic  
278 encephalomyelitis/chronic fatigue syndrome: clinical working case definition,  
279 diagnostic and treatment protocols. *J Chronic Fatigue Syndrome* 2003;**11**:7–115.
- 280 2 Lowry TJ, Pakenham KI. Health-related quality of life in chronic fatigue  
281 syndrome: Predictors of physical functioning and psychological distress. *Psychol*  
282 *Health Med* 2008;**13**:222–38. doi:10.1080/13548500701335698
- 283 3 de Carvalho Leite JC, de L Drachler M, Killeit A, *et al.* Social support needs for  
284 equity in health and social care: a thematic analysis of experiences of people with  
285 chronic fatigue syndrome/myalgic encephalomyelitis. *Int J Equity Health*  
286 2011;**10**:46. doi:10.1186/1475-9276-10-46
- 287 4 Nacul LC, Lacerda EM, Campion P, *et al.* The functional status and well being of  
288 people with myalgic encephalomyelitis/chronic fatigue syndrome and their  
289 carers. *BMC Public Health* 2011;**11**:402. doi:10.1186/1471-2458-11-402
- 290 5 Raine R, Carter S, Sensky T, *et al.* General practitioners' perceptions of chronic  
291 fatigue syndrome and beliefs about its management, compared with irritable  
292 bowel syndrome: qualitative study. *BMJ* 2004;**328**:1354–7.  
293 doi:10.1136/bmj.38078.503819.EE
- 294 6 McManimen SL, Sunnquist ML, Jason LA. Deconstructing post-exertional  
295 malaise: An exploratory factor analysis. *J Health Psychol*  
296 2016;**35**:1359105316664139. doi:10.1177/1359105316664139
- 297 7 Jason LA, Evans M, So S, *et al.* Problems in defining post-exertional malaise. *J*  
298 *Prev Interv Community* 2015;**43**:20–31. doi:10.1080/10852352.2014.973239
- 299 8 Nacul L, Lacerda EM, Kingdon CC, *et al.* How have selection bias and disease  
300 misclassification undermined the validity of myalgic encephalomyelitis/chronic

- 1  
2  
3 301 fatigue syndrome studies? *J Health Psychol* 2017;:1359105317695803.  
4  
5 302 doi:10.1177/1359105317695803  
6  
7 303 9 Fukuda K, Straus SE, Hickie I, *et al.* The chronic fatigue syndrome: a  
8  
9 304 comprehensive approach to its definition and study. International Chronic  
10  
11 305 Fatigue Syndrome Study Group. *Ann Intern Med* 1994;**121**:953–9.  
12  
13 306 doi:10.7326/0003-4819-121-12-199412150-00009  
14  
15 307 10 Carruthers BM, van de Sande MI, De Meirleir KL, *et al.* Myalgic  
16  
17 308 encephalomyelitis: International Consensus Criteria. *J Intern Med* 2011;**270**:327–  
18  
19 309 38. doi:10.1111/j.1365-2796.2011.02428.x  
20  
21 310 11 Krumina A, Vasiljeva G, Ivanovs A, *et al.* Assessment of Value of Fatigue  
22  
23 311 Severity and Symptoms in Patients with Chronic Fatigue Syndrome/Myalgic  
24  
25 312 Encephalomyelitis and Fibromyalgia. *Br J Med Med Res* 2014;**4**:5866–77.  
26  
27 313 doi:10.9734/BJMMR/2014/12225  
28  
29 314 12 Reeves WC, Lloyd A, Vernon SD, *et al.* Identification of ambiguities in the 1994  
30  
31 315 chronic fatigue syndrome research case definition and recommendations for  
32  
33 316 resolution. *BMC Health Serv Res* 2003;**3**:25. doi:10.1186/1472-6963-3-25  
34  
35 317 13 Arpino C, Carrieri MP, Valesini G, *et al.* Idiopathic chronic fatigue and chronic  
36  
37 318 fatigue syndrome: a comparison of two case-definitions. *Ann Ist Super Sanita*  
38  
39 319 1999;**35**:435–41. <http://www.ncbi.nlm.nih.gov/pubmed/10721210> (accessed 6  
40  
41 320 Nov 2017).  
42  
43 321 14 Líndal E, Stefánsson JG, Bergmann S. The prevalence of chronic fatigue  
44  
45 322 syndrome in Iceland - a national comparison by gender drawing on four different  
46  
47 323 criteria. *Nord J Psychiatry* 2002;**56**:273–7. doi:10.1080/08039480260242769  
48  
49 324 15 Lloyd AR, Wakefield D, Boughton C, *et al.* What is myalgic encephalomyelitis?  
50  
51 325 *Lancet (London, England)* 1988;**1**:1286–7. doi:10.1016/S0140-6736(88)92107-1  
52  
53  
54  
55  
56  
57  
58  
59  
60

- 1  
2  
3 326 16 Holmes GP, Kaplan JE, Gantz NM, *et al.* Chronic fatigue syndrome: a working  
4  
5 327 case definition. *Ann Intern Med* 1988;**108**:387–9. doi:10.1059/0003-4819-108-3-  
6  
7 328 387
- 8  
9 329 17 Ranjith G. Epidemiology of chronic fatigue syndrome. *Occup Med (Lond)*  
10  
11 330 2005;**55**:13–9. doi:10.1093/occmed/kqi012
- 12  
13 331 18 Dinos S, Khoshaba B, Ashby D, *et al.* A systematic review of chronic fatigue, its  
14  
15 332 syndromes and ethnicity: prevalence, severity, co-morbidity and coping. *Int J*  
16  
17 333 *Epidemiol* 2009;**38**:1554–70. doi:10.1093/ije/dyp147
- 18  
19  
20 334 19 Johnston S, Brenu EW, Staines DR, *et al.* The adoption of chronic fatigue  
21  
22 335 syndrome/myalgic encephalomyelitis case definitions to assess prevalence: a  
23  
24 336 systematic review. *Ann Epidemiol* 2013;**23**:371–6.  
25  
26 337 doi:10.1016/j.annepidem.2013.04.003
- 27  
28  
29 338 20 Shojania KG, Sampson M, Ansari MT, *et al.* *Updating Systematic Reviews*.  
30  
31 339 Agency for Healthcare Research and Quality (US) 2007.  
32  
33 340 <http://www.ncbi.nlm.nih.gov/pubmed/20734512> (accessed 13 Oct 2017).
- 34  
35 341 21 Dowsett EG, Goudsmit E, Macintyre A SC. The National Task Force on Chronic  
36  
37 342 Fatigue Syndrome (CFS), Post Viral Fatigue Syndrome (PVFS), Myalgic  
38  
39 343 Encephalomyelitis (ME). *Westcare* 1994.
- 40  
41  
42 344 22 Institute of Medicine IOM. *Beyond Myalgic Encephalomyelitis/Chronic Fatigue*  
43  
44 345 *Syndrome: Redefining an Illness*. *Natl Acad Press* 2015.
- 45  
46 346 23 Munn Z, Moola S, Lisy K, *et al.* Methodological guidance for systematic reviews  
47  
48 347 of observational epidemiological studies reporting prevalence and cumulative  
49  
50 348 incidence data. *Int J Evid Based Healthc* 2015;**13**:147–53.  
51  
52 349 doi:10.1097/XEB.0000000000000054
- 53  
54  
55 350 24 von Elm E, Altman DG, Egger M, *et al.* The Strengthening the Reporting of

- 1  
2  
3 351 Observational Studies in Epidemiology (STROBE) statement: guidelines for  
4 reporting observational studies. *Lancet (London, England)* 2007;**4**:e296.  
5 352 doi:10.1371/journal.pmed.0040296  
6  
7 353  
8  
9 354 25 Higgins JPT, Thompson SG, Deeks JJ, *et al.* Measuring inconsistency in meta-  
10 analyses. *BMJ* 2003;**327**:557–60. doi:10.1136/bmj.327.7414.557  
11 355  
12  
13 356 26 Moher D, Liberati A, Tetzlaff J, *et al.* Preferred reporting items for systematic  
14 reviews and meta-analyses: the PRISMA statement. *BMJ* 2009;**339**:b2535.  
15 357 doi:10.1016/j.jcms.2010.11.001  
16 358  
17  
18  
19  
20 359  
21  
22 360  
23  
24  
25  
26  
27  
28  
29  
30  
31  
32  
33  
34  
35  
36  
37  
38  
39  
40  
41  
42  
43  
44  
45  
46  
47  
48  
49  
50  
51  
52  
53  
54  
55  
56  
57  
58  
59  
60

1  
2  
3  
4  
5  
6  
7  
8  
9  
10  
11  
12  
13  
14  
15  
16  
17  
18  
19  
20  
21  
22  
23  
24  
25  
26  
27  
28  
29  
30  
31  
32  
33  
34  
35  
36  
37  
38  
39  
40  
41  
42  
43  
44  
45  
46  
47  
48  
49  
50  
51  
52  
53  
54  
55  
56  
57  
58  
59  
60

361 Figure 1. Flow diagram for study selection

362

363 WOS, web of science; ME/CFS, myalgic encephalomyelitis/chronic fatigue syndrome.

364

For peer review only



365 Table 1. The primary systematic literature search strategy on the electronic databases

| Database       | Search terms combination                                                                                                                                                      |
|----------------|-------------------------------------------------------------------------------------------------------------------------------------------------------------------------------|
| Scopus         | ({epidemiology} OR {prevalence} OR {incidence}) AND ({chronic fatigue syndrome} OR {myalgic encephalomyelitis} OR {myalgic encephalomyelitis} OR {CFS/ME})                    |
| PubMed         | ("Fatigue Syndrome, Chronic"[Mesh] AND (("Incidence"[Mesh] OR "Epidemiology"[Mesh] OR "epidemiology" [Subheading]) OR "Prevalence"[Mesh] OR "Cross-Sectional Studies"[Mesh])) |
| Web of science | ("epidemiology" OR "prevalence" OR "incidence") AND ("chronic fatigue syndrome" OR "myalgic encephalomyelitis" OR "CFS/ME" OR "ME/CFS")                                       |

366

367 Mesh, medical subject headings

368

369

370

371

372

373

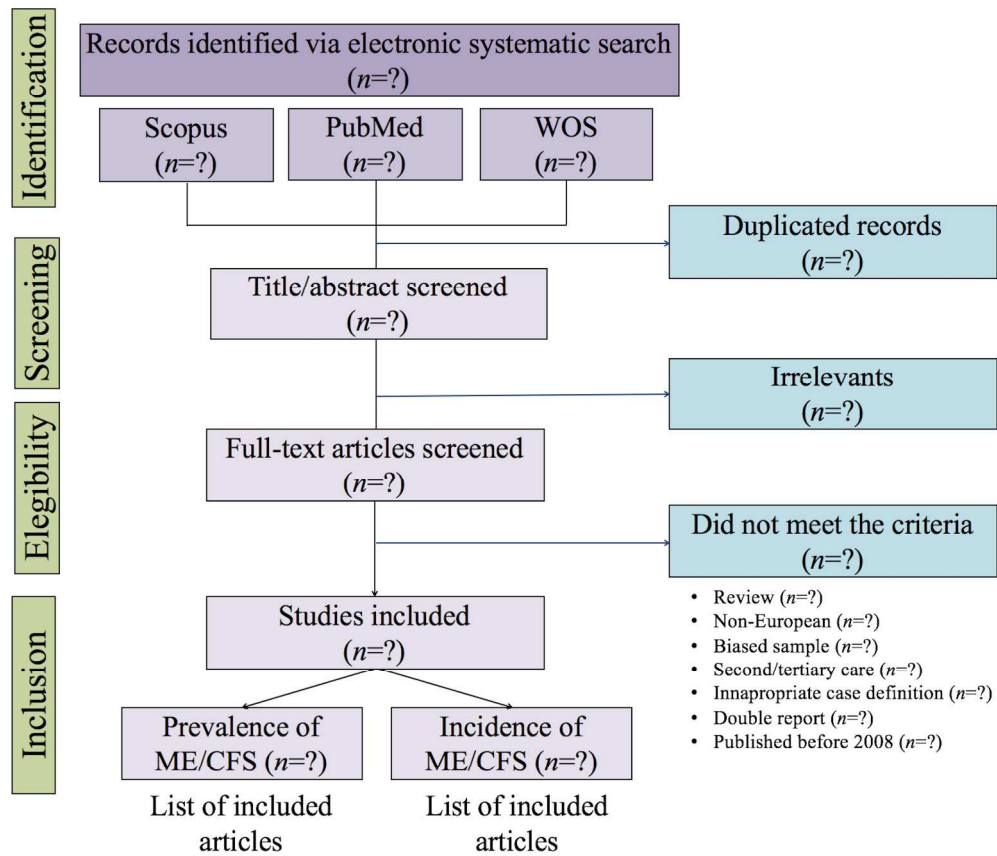

Figure 1. Flow diagram for study selection

254x219mm (300 x 300 DPI)
